# Supplementary material for: Scaling of subcellular actin structures with cell length through decelerated growth
Source: eLife. 2021 Jun 11;10:e68424. doi: 10.7554/eLife.68424 (PMC8233038; doi:10.7554/eLife.68424)
Supplement: Figure 1—source data 1. — The p-value is indicated for student’s t-test used to compare the data presented in Figure 1 and Figure 1—figure supplement 1. [file elife-68424-fig1-data1.xlsx]

## Sheet: Sheet1
Figure 1-source data 1: Complete statistical results from students t-test conducted for data in Figure 1 and Supplemental Figure 1.
P-values are indicated for each students t-test conducted.
Figure 1E (Mother cell volume)	yBG12	yBG9	cdc28-13, uninduced	cdc28-13, induced
yBG12		0.00114541	0.2589	9.04583e-07
yBG9	0.00114541		0.000444776	7.34712e-06
cdc28-13, uninduced	0.2589	0.000444776		0.000518546
cdc28-13, induced	9.04583e-07	7.34712e-06	0.000518546
Figure 1F (Mother cell length)	yBG12	yBG9	cdc28-13, uninduced	cdc28-13, induced
yBG12		0.011187	0.345263	8.64534e-05
yBG9	0.011187		0.0351777	0.0100539
cdc28-13, uninduced	0.345263	0.0351777		0.000518546
cdc28-13, induced	8.64534e-05	0.0100539	0.000518546
Figure 1G (Cable length)	yBG12	yBG9	cdc28-13, uninduced	cdc28-13, induced
yBG12		0.0141147	0.294661	0.000178466
yBG9	0.0141147		0.00755738	0.0124318
cdc28-13, uninduced	0.294661	0.00755738		7.4024e-05
cdc28-13, induced	0.000178466	0.0124318	7.4024e-05
Figure 1H (Cable length / Mother cell length)	yBG12	yBG9	cdc28-13, uninduced	cdc28-13, induced
yBG12		0.528	0.218	0.402
yBG9	0.528		0.224	0.408
cdc28-13, uninduced	0.218	0.224		0.3017
cdc28-13, induced	0.402	0.408	0.3017
figure S1C (End-to-end distance)	yBG12	yBG9	cdc28-13, uninduced	cdc28-13, induced
yBG12		0.0143274	0.39239	1.79266e-07
yBG9	0.0143274		0.0127548	0.0178643
cdc28-13, uninduced	0.39239	0.0127548		1.69625e-06
cdc28-13, induced	1.79266e-07	0.0178643	1.69625e-06
figure S1D (Tortuosity)	yBG12	yBG9	cdc28-13, uninduced	cdc28-13, induced
yBG12		0.860327	0.486185	0.405837
yBG9	0.860327		0.00299993	0.360632
cdc28-13, uninduced	0.486185	0.00299993		0.147986
cdc28-13, induced	0.405837	0.360632	0.147986
