# Supplementary material for: Scaling of subcellular actin structures with cell length through decelerated growth
Source: eLife. 2021 Jun 11;10:e68424. doi: 10.7554/eLife.68424 (PMC8233038; doi:10.7554/eLife.68424)
Supplement: Supplementary file 1. — The genotype, source, and related data are indicated for each strain used in this study. [file elife-68424-supp1.xlsx]

## Sheet: Sheet1
Name	Genotype	Source	Figures used in
BGY12	his3-11,15;ura3-52;leu2-3,112;ade2-1;trp1-1;psi+;ssd-;GAL+	Lab stock	Fig. 1A, Fig. 1E-K, figS1C-E
BGY9	his3-11,15/his3-11,15;ura3-52/ura3-52;leu2-3,112/leu2-3,112;ade2-1/ade2-1;trp1-1/trp1-1;psi+;ssd-;GAL+	Lab stock	Fig. 1B, Fig. 1E-K, figS1C-E
cdc28-13ts	cdc28-13; his3-11,15 trp1-1 leu2-3 ura3-1 ade2-1	Brian Graziano	Fig. 1C-K, figS1A-E
Abp140Envy	Abp140-Envy::SpHIS5; his3-11,15;ura3-52;leu2-3,112;ade2-1;trp1-1;psi+;ssd-;GAL+	This study	Fig. 2E-G, Fig. 3A-D, fig. S3B-E, fig. S4A-C
Abp140Envy; smy1Δ	Abp140-Envy::SpHIS5; smy1∆::TRP1; his3-11,15;ura3-52;leu2-3,112;ade2-1;trp1-1;psi+;ssd-;GAL+	This study	Fig. 3A-E, fig. S4A-C
Abp140Envy; cdc28-13ts	cdc28-13; Abp140-Envy::SpHIS5; his3-11,15 trp1-1 leu2-3 ura3-1 ade2-1	This study	Fig. 4B-G, fig S5A-E
